# Supplementary material for: New Radiolabeled Exendin Analogues Show Reduced Renal Retention
Source: PubMed Central journal article supplement (PMC10324399; doi:10.1021/acs.molpharmaceut.3c00117), 2023-06-02
Supplement: mp3c00117_si_001.pdf [file mp3c00117_si_001.pdf]

## 1 **Supporting information**

2

## 3 **Materials and methods**

### 4 *Serum stability of <sup>68</sup>Ga- and <sup>177</sup>Lu-labeled exendin-4 analogues*

5 NOTA-MI-exendin-4, NOTA-exendin-4, NODAGA-MI-exendin-4 and NODAGA-exendin-4 were labeled  
6 with <sup>68</sup>Ga at a molar activity of 314, 167, 531 and 164 GBq/μmol respectively and quality control and  
7 purification were performed as described in the materials and methods of the main text (Section  
8 radiolabeling of exendin-4 analogues with <sup>68</sup>Ga). DOTA-exendin-4 and DOTA-MI-exendin-4 were  
9 labeled with <sup>177</sup>Lu at a molar activity of 75 GBq/μmol. The radiolabeled compounds were incubated in  
10 human serum (1:10) at 37°C and samples were taken after 1 and 2 hour incubation for the <sup>68</sup>Ga-labeled  
11 compounds and additional sampling was done after 4 and 24 hours for the <sup>177</sup>Lu-labeled compounds.  
12 Supernatant was obtained by precipitating the serum proteins by adding a 1:1 (v/v) volume of  
13 acetonitrile, followed by centrifugation for 5 min at 3220xg. Subsequently, the supernatant was  
14 analyzed using RP-HPLC. RP-HPLC was performed as described in the main text.

15

## 16 **Results**

### 17 *Biodistribution of [<sup>68</sup>Ga]Ga-NOTA-exendin-4, [<sup>68</sup>Ga]Ga-NOTA-MI-exendin-4, [<sup>68</sup>Ga]Ga-NODAGA-* 18 *exendin-4 and [<sup>68</sup>Ga]Ga-NODAGA-MI-exendin-4 in healthy mice*

19 The complete biodistribution of [<sup>68</sup>Ga]Ga-NOTA-exendin-4, [<sup>68</sup>Ga]Ga-NOTA-MI-exendin-4, [<sup>68</sup>Ga]Ga-  
20 NODAGA-exendin-4 and [<sup>68</sup>Ga]Ga-NODAGA-MI-exendin-4 in healthy C3H mice is presented in Table S3.

21 All compounds show rapid elimination from the circulation. When comparing the kidney uptake of  
22 [<sup>68</sup>Ga]Ga-NODAGA-MI-exendin-4 with [<sup>68</sup>Ga]Ga-NODAGA-exendin-4, a decreased uptake of almost  
23 58% was found ( $109 \pm 7$  %IA/g vs  $258 \pm 21$  %IA/g respectively,  $p < 0.0001$ ) four hours after injection. For  
24 [<sup>68</sup>Ga]Ga-NOTA-MI-exendin-4 and [<sup>68</sup>Ga]Ga-NOTA-exendin-4 this reduction was even higher, 65% ( $72.7$   
25  $\pm 3.9$  %IA/g vs  $208 \pm 17$  %IA/g respectively,  $p < 0.0001$ ). In addition, whereas the kidney uptake  
26 remained high during four hours for both compounds without the cleavable linker, the uptake

27 decreased with 39% for [<sup>68</sup>Ga]Ga-NODAGA-MI-exendin-4 from one to four hours and reduced with  
28 even 52% for [<sup>68</sup>Ga]Ga-NOTA-MI-exendin-4.  
29 Overall, a much lower kidney uptake was observed for both NOTA-conjugated compounds than for the  
30 NODAGA-conjugated compounds. Furthermore, a higher pancreas-to-kidney ratio was found for  
31 [<sup>68</sup>Ga]Ga-NOTA-MI-exendin-4 ( $0.17 \pm 0.01$ ) compared to [<sup>68</sup>Ga]Ga-NODAGA-MI-exendin-4 ( $0.11 \pm 0.01$ )  
32 ( $p < 0.0001$ ). Co-injection of unlabeled exendin-4 showed that the uptake of all radiolabeled peptides  
33 in the pancreas, lungs and duodenum (transition from stomach to duodenum) could be blocked by an  
34 excess unlabeled peptide and therefore was GLP-1 receptor mediated.

35

36

37

38

39

40

41

42

43

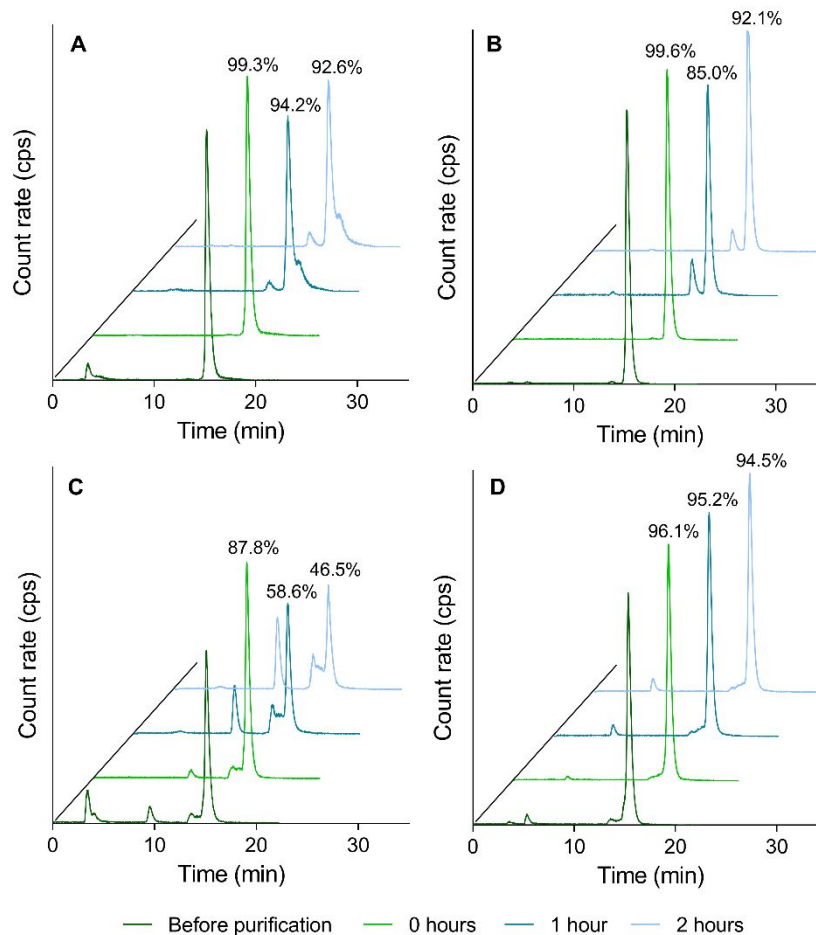

**Figure S1.** Stability of <sup>68</sup>Ga-labeled NODAGA-exendin-4 (A), NOTA-exendin-4 (B), NODAGA-MI-exendin-4 (C) and NOTA-MI-exendin-4 (D) before purification, and before and 1 and 2 hours after incubation in human serum at 37°C. Graphs show HPLC profiles.

44  
45  
46  
47  
48  
49  
50  
51  
52  
53  
54  
55  
56  
57  
58  
59

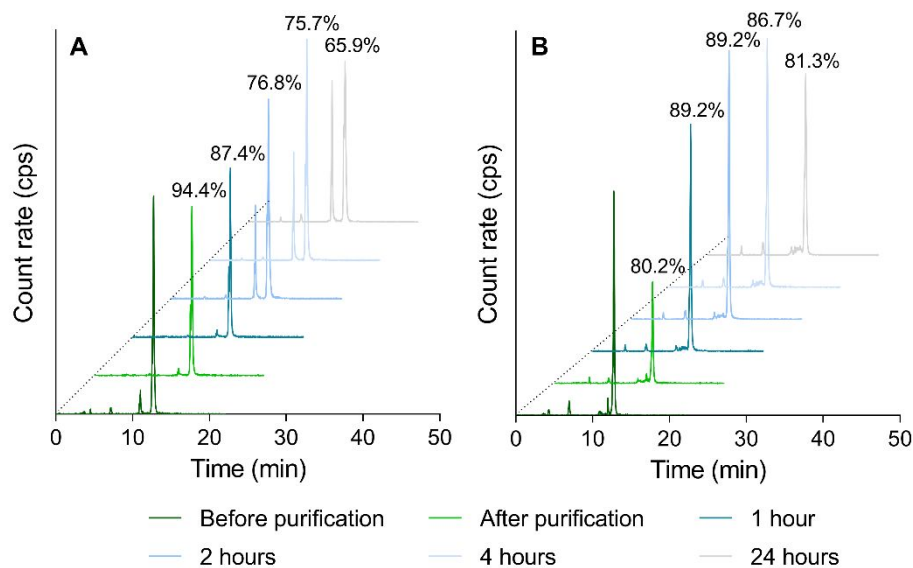

**Figure S2.** Stability of  $^{177}\text{Lu}$ -labeled DOTA-exendin-4 (A) and DOTA-MI-exendin-4 (B) before purification, and before and 1, 2, 4 and 24 hours after incubation in human serum at 37°C. Graphs show HPLC profiles.

**Table S1.** Name, abbreviation, molecular mass and amino acid sequence of exendin-4 derivatives.

| Peptide                                                   | Abbreviation        | Molecular weight (Da) | Amino Acid sequence                                                                        |
|-----------------------------------------------------------|---------------------|-----------------------|--------------------------------------------------------------------------------------------|
| [Lys <sup>40</sup> (DTPA)]-exendin-3                      | DTPA-exendin-3      | 4816.3                | HSDGTGTS $\text{DLSKQMEEEEAVRLFIEWLKNGGPSSGAPPPS-K(DTPA)-NH}_2$                            |
| Exendin-4                                                 | Exendin-4           | 4186.6                | HGEGTFTSDLSKQMEEEEAVRLFIEWLKNGGPSSGAPPPS-NH <sub>2</sub>                                   |
| [Lys <sup>40</sup> (NODAGA)]-exendin-4                    | NODAGA-exendin-4    | 4673.6                | HGEGTFTSDLSKQMEEEEAVRLFIEWLKNGGPSSGAPPPS-K(NODAGA-Bn-SCN)-NH <sub>2</sub>                  |
| Lys <sup>40</sup> [Mep((S)-NODAGA-Met-Ile-Mal)]-exendin-4 | NODAGA-MI-exendin-4 | 5308.95               | HGEGTFTSDLSKQMEEEEAVRLFIEWLKNGGPSSGAPPPS-K(Mep(NODAGA-Bn-SCN-Met-Ile-Mal))-NH <sub>2</sub> |
| [Lys <sup>40</sup> (NOTA)]-exendin-4                      | NOTA-exendin-4      | 4765.3                | HGEGTFTSDLSKQMEEEEAVRLFIEWLKNGGPSSGAPPPS-K(NOTA-Bn-SCN)-NH <sub>2</sub>                    |
| Lys <sup>40</sup> [Mep((S)-NOTA-Met-Ile-Mal)]-exendin-4   | NOTA-MI-exendin-4   | 5237.9                | HGEGTFTSDLSKQMEEEEAVRLFIEWLKNGGPSSGAPPPS-K(Mep(NOTA-Bn-SCN-Met-Ile-Mal))-NH <sub>2</sub>   |
| [Lys <sup>40</sup> (DOTA)]-exendin-4                      | DOTA-exendin-4      | 4866.4                | HGEGTFTSDLSKQMEEEEAVRLFIEWLKNGGPSSGAPPPS-K(DOTA-Bn-SCN)-NH <sub>2</sub>                    |
| Lys <sup>40</sup> [Mep((S)-DOTA-Met-Ile-Mal)]-exendin-4   | DOTA-MI-exendin-4   | 5339                  | HGEGTFTSDLSKQMEEEEAVRLFIEWLKNGGPSSGAPPPS-K(Mep(DOTA-Bn-SCN-Met-Ile-Mal))-NH <sub>2</sub>   |

60 **Table S2.** Biodistribution of <sup>68</sup>Ga-labeled NOTA-exendin-4 and NOTA-MI-exendin-4 in BALB/c nude mice bearing a  
 61 subcutaneous INS-1 tumor. Kidney and tumor data are shown in Figure 4. Values are expressed as percentage injected activity  
 62 per gram tissue (%IA/g).

|                 | <sup>68</sup> Ga]Ga-NOTA-exendin-4 |                |                |                      | <sup>68</sup> Ga]Ga-NOTA-MI-exendin-4 |                |                |                      |
|-----------------|------------------------------------|----------------|----------------|----------------------|---------------------------------------|----------------|----------------|----------------------|
|                 | 1h (n=5)                           | 2h (n=5)       | 4h (n=5)       | + excess<br>4h (n=2) | 1h (n=5)                              | 2h (n=5)       | 4h (n=5)       | + excess<br>4h (n=2) |
| <b>Blood</b>    | 0.25 ±<br>0.04                     | 0.14 ±<br>0.01 | 0.11 ±<br>0.01 | 0.06 ±<br>0.01       | 0.33 ±<br>0.01                        | 0.22 ±<br>0.02 | 0.14 ±<br>0.01 | 0.12 ±<br>0.03       |
| <b>Muscle</b>   | 0.05 ±<br>0.01                     | 0.04 ±<br>0.01 | 0.08 ±<br>0.05 | 0.03 ±<br>0.02       | 0.04 ±<br>0.01                        | 0.04 ±<br>0.02 | 0.02 ±<br>0.01 | 0.03 ±<br>0.00       |
| <b>Tumor</b>    | 27.8 ±<br>4.9                      | 27.4 ±<br>4.7  | 24.9 ±<br>9.3  | 1.45 ±<br>0.02       | 29.3 ±<br>6.9                         | 30.1 ±<br>9.9  | 25.0 ±<br>8.0  | 1.35 ±<br>0.25       |
| <b>Heart</b>    | 0.20 ±<br>0.02                     | 0.15 ±<br>0.01 | 0.14 ±<br>0.02 | 0.05 ±<br>0.00       | 0.24 ±<br>0.03                        | 0.18 ±<br>0.02 | 0.13 ±<br>0.01 | 0.08 ±<br>0.02       |
| <b>Lung</b>     | 4.34 ±<br>0.85                     | 4.49 ±<br>0.85 | 3.14 ±<br>0.46 | 0.22 ±<br>0.04       | 6.33 ±<br>1.54                        | 5.77 ±<br>1.18 | 3.69 ±<br>0.64 | 0.31 ±<br>0.01       |
| <b>Spleen</b>   | 0.28 ±<br>0.03                     | 0.30 ±<br>0.04 | 0.31 ±<br>0.07 | 0.17 ±<br>0.00       | 0.28 ±<br>0.08                        | 0.23 ±<br>0.04 | 0.21 ±<br>0.05 | 0.08 ±<br>0.01       |
| <b>Pancreas</b> | 13.1 ±<br>2.2                      | 12.3 ±<br>2.9  | 10.7 ±<br>0.9  | 0.29 ±<br>0.01       | 11.4 ±<br>2.7                         | 10.4 ±<br>1.9  | 7.61 ±<br>2.14 | 0.30 ±<br>0.02       |
| <b>Kidney</b>   | 127 ± 17                           | 114 ± 12       | 128 ± 9        | 161 ± 3              | 103 ± 15                              | 73.4 ±<br>6.7  | 34.2 ±<br>4.2  | 42.5 ±<br>7.3        |
| <b>Liver</b>    | 0.56 ±<br>0.03                     | 0.45 ±<br>0.04 | 0.53 ±<br>0.06 | 0.47 ±<br>0.06       | 0.51 ±<br>0.04                        | 0.43 ±<br>0.06 | 0.33 ±<br>0.04 | 0.22 ±<br>0.03       |
| <b>Stomach</b>  | 2.46 ±<br>0.45                     | 2.03 ±<br>0.30 | 2.07 ±<br>0.27 | 0.12 ±<br>0.01       | 2.86 ±<br>0.32                        | 2.35 ±<br>0.14 | 1.59 ±<br>0.66 | 0.20 ±<br>0.08       |
| <b>Duodenum</b> | 3.39 ±<br>1.37                     | 4.00 ±<br>0.45 | 4.18 ±<br>0.59 | 0.35 ±<br>0.14       | 3.89 ±<br>1.59                        | 4.49 ±<br>1.15 | 2.42 ±<br>1.56 | 0.35 ±<br>0.03       |

63

64

65 **Table S3A.** Biodistribution of <sup>68</sup>Ga-labeled NOTA-exendin-4 and NOTA-MI-exendin-4 in C3H mice. Kidney and pancreas data  
 66 are shown in Figure 3. Values are expressed as percentage injected activity per gram tissue (%IA/g).

|                 | <sup>68</sup> Ga]Ga-NOTA-exendin-4 |                |                |                      | <sup>68</sup> Ga]Ga-NOTA-MI-exendin-4 |                |                |                      |
|-----------------|------------------------------------|----------------|----------------|----------------------|---------------------------------------|----------------|----------------|----------------------|
|                 | 1h (n=5)                           | 2h (n=5)       | 4h (n=4)       | + excess<br>4h (n=2) | 1h (n=5)                              | 2h (n=5)       | 4h (n=5)       | + excess<br>4h (n=2) |
| <b>Blood</b>    | 0.36 ±<br>0.02                     | 0.16 ±<br>0.01 | 0.11 ±<br>0.01 | 0.10 ±<br>0.00       | 0.48 ±<br>0.05                        | 0.28 ±<br>0.02 | 0.17 ±<br>0.02 | 0.12 ±<br>0.00       |
| <b>Muscle</b>   | 0.07 ±<br>0.00                     | 0.04 ±<br>0.01 | 0.05 ±<br>0.02 | 0.03 ±<br>0.01       | 0.08 ±<br>0.01                        | 0.05 ±<br>0.01 | 0.04 ±<br>0.02 | 0.02 ±<br>0.00       |
| <b>Heart</b>    | 0.29 ±<br>0.02                     | 0.19 ±<br>0.02 | 0.16 ±<br>0.04 | 0.09 ±<br>0.00       | 0.37 ±<br>0.04                        | 0.24 ±<br>0.04 | 0.15 ±<br>0.03 | 0.07 ±<br>0.01       |
| <b>Lung</b>     | 18.7 ±<br>1.6                      | 14.6 ±<br>1.5  | 12.9 ±<br>3.1  | 0.44 ±<br>0.10       | 21.0 ±<br>3.3                         | 19.6 ±<br>1.3  | 13.1 ±<br>1.0  | 0.45 ±<br>0.10       |
| <b>Spleen</b>   | 0.27 ±<br>0.05                     | 0.22 ±<br>0.02 | 0.27 ±<br>0.13 | 0.21 ±<br>0.01       | 0.26 ±<br>0.03                        | 0.25 ±<br>0.08 | 0.15 ±<br>0.03 | 0.10 ±<br>0.01       |
| <b>Pancreas</b> | 21.5 ±<br>1.2                      | 20.6 ±<br>2.3  | 18.3 ±<br>3.4  | 0.36 ±<br>0.03       | 22.2 ±<br>2.3                         | 18.5 ±<br>0.9  | 11.6 ±<br>1.4  | 0.35 ±<br>0.05       |
| <b>Kidney</b>   | 203 ± 15                           | 203 ± 11       | 208 ± 17       | 250 ± 8              | 152 ± 17                              | 106 ± 5        | 72.7 ±<br>3.9  | 37.7 ±<br>12.0       |
| <b>Liver</b>    | 0.43 ±<br>0.05                     | 0.39 ±<br>0.02 | 0.42 ±<br>0.06 | 0.50 ±<br>0.00       | 0.53 ±<br>0.06                        | 0.47 ±<br>0.04 | 0.37 ±<br>0.04 | 0.37 ±<br>0.14       |

|                 |        |        |        |        |        |        |        |        |
|-----------------|--------|--------|--------|--------|--------|--------|--------|--------|
| <b>Stomach</b>  | 5.38 ± | 4.44 ± | 4.58 ± | 0.21 ± | 5.83 ± | 4.53 ± | 3.14 ± | 0.19 ± |
|                 | 0.43   | 0.71   | 0.18   | 0.01   | 0.99   | 0.78   | 0.10   | 0.04   |
| <b>Duodenum</b> | 5.43 ± | 4.87 ± | 4.52 ± | 0.26 ± | 5.97 ± | 4.79 ± | 3.11 ± | 1.09 ± |
|                 | 1.25   | 1.50   | 0.38   | 0.02   | 0.39   | 0.95   | 0.58   | 0.21   |

67  
68  
69  
70

**Table S3B.** Biodistribution of <sup>68</sup>Ga-labeled NODAGA-exendin-4 and NODAGA-MI-exendin-4 in C3H mice. Values are expressed as percentage injected activity per gram tissue (%IA/g).

|                 | <sup>68</sup> Ga]Ga-NODAGA-exendin-4 |                |                |                      | <sup>68</sup> Ga]Ga-NODAGA-MI-exendin-4 |                |                |                      |
|-----------------|--------------------------------------|----------------|----------------|----------------------|-----------------------------------------|----------------|----------------|----------------------|
|                 | 1h (n=5)                             | 2h (n=5)       | 4h (n=5)       | + excess<br>4h (n=2) | 1h (n=5)                                | 2h (n=5)       | 4h (n=5)       | + excess<br>4h (n=2) |
| <b>Blood</b>    | 0.37 ±<br>0.03                       | 0.17 ±<br>0.01 | 0.10 ±<br>0.01 | 0.05 ±<br>0.00       | 0.56 ±<br>0.06                          | 0.29 ±<br>0.02 | 0.21 ±<br>0.01 | 0.18 ±<br>0.01       |
| <b>Muscle</b>   | 0.09 ±<br>0.03                       | 0.05 ±<br>0.01 | 0.05 ±<br>0.00 | 0.04 ±<br>0.01       | 0.09 ±<br>0.01                          | 0.05 ±<br>0.01 | 0.04 ±<br>0.01 | 0.02 ±<br>0.00       |
| <b>Heart</b>    | 0.29 ±<br>0.04                       | 0.22 ±<br>0.06 | 0.17 ±<br>0.02 | 0.06 ±<br>0.01       | 0.34 ±<br>0.04                          | 0.21 ±<br>0.01 | 0.15 ±<br>0.01 | 0.08 ±<br>0.01       |
| <b>Lung</b>     | 25.8 ±<br>3.0                        | 18.6 ±<br>3.2  | 12.7 ±<br>1.5  | 0.5 ± 0.1            | 17.9 ±<br>3.2                           | 11.4 ±<br>2.0  | 11.1 ±<br>2.1  | 0.65 ±<br>0.12       |
| <b>Spleen</b>   | 0.27 ±<br>0.06                       | 0.21 ±<br>0.01 | 0.21 ±<br>0.03 | 0.12 ±<br>0.00       | 0.27 ±<br>0.02                          | 0.20 ±<br>0.03 | 0.18 ±<br>0.03 | 0.13 ±<br>0.01       |
| <b>Pancreas</b> | 24.3 ±<br>3.3                        | 22.6 ±<br>1.9  | 21.7 ±<br>2.3  | 0.43 ±<br>0.05       | 16.9 ±<br>0.7                           | 14.4 ±<br>1.3  | 10.2 ±<br>0.8  | 0.44 ±<br>0.02       |
| <b>Kidney</b>   | 256 ± 10                             | 242 ± 15       | 258 ± 21       | 276 ± 15             | 179 ± 8                                 | 131 ± 19       | 109 ± 7        | 98 ± 8               |
| <b>Liver</b>    | 0.41 ±<br>0.03                       | 0.37 ±<br>0.02 | 0.39 ±<br>0.05 | 0.28 ±<br>0.00       | 0.74 ±<br>0.05                          | 0.57 ±<br>0.03 | 0.50 ±<br>0.02 | 0.39 ±<br>0.04       |
| <b>Stomach</b>  | 6.05 ±<br>0.80                       | 5.23 ±<br>1.01 | 5.71 ±<br>1.34 | 0.22 ±<br>0.04       | 4.11 ±<br>0.63                          | 3.36 ±<br>0.77 | 2.67 ±<br>0.25 | 0.24 ±<br>0.01       |
| <b>Duodenum</b> | 5.98 ±<br>1.78                       | 5.67 ±<br>0.84 | 5.07 ±<br>1.05 | 0.22 ±<br>0.01       | 4.77 ±<br>0.96                          | 3.49 ±<br>1.35 | 2.38 ±<br>0.18 | 0.68 ±<br>0.26       |

71  
72  
73  
74

**Table S4A.** Biodistribution of [<sup>177</sup>Lu]Lu-DOTA-exendin-4 in BALB/c nude mice bearing a subcutaneous INS-1 tumor. Values are expressed as percentage injected activity per gram tissue (%IA/g).

|                    | <sup>177</sup> Lu]Lu-DOTA-exendin-4 |              |             |             |             |             |                      |
|--------------------|-------------------------------------|--------------|-------------|-------------|-------------|-------------|----------------------|
|                    | 15min (n=5)                         | 30 min (n=5) | 4h (n=5)    | 24h (n=5)   | 48h (n=5)   | 72h (n=5)   | + excess<br>4h (n=2) |
| <b>Blood</b>       | 2.53 ± 0.84                         | 0.87 ± 0.19  | 0.10 ± 0.01 | 0.03 ± 0.00 | 0.01 ± 0.00 | 0.01 ± 0.00 | 0.10 ± 0.01          |
| <b>Muscle</b>      | 0.56 ± 0.10                         | 0.19 ± 0.07  | 0.03 ± 0.01 | 0.02 ± 0.00 | 0.02 ± 0.00 | 0.01 ± 0.00 | 0.02 ± 0.00          |
| <b>Tumor</b>       | 23.4 ± 5.9                          | 23.7 ± 6.4   | 16.5 ± 5.9  | 11.3 ± 2.0  | 10.8 ± 4.5  | 6.86 ± 2.86 | 1.32 ± 0.23          |
| <b>Heart</b>       | 0.98 ± 0.17                         | 0.41 ± 0.16  | 0.48 ± 0.88 | 0.06 ± 0.01 | 0.05 ± 0.01 | 0.04 ± 0.00 | 0.07 ± 0.00          |
| <b>Lung</b>        | 9.11 ± 2.21                         | 8.47 ± 4.82  | 2.91 ± 1.67 | 1.91 ± 0.28 | 1.29 ± 0.30 | 1.02 ± 0.24 | 0.25 ± 0.01          |
| <b>Spleen</b>      | 0.70 ± 0.32                         | 0.32 ± 0.05  | 0.16 ± 0.03 | 0.14 ± 0.02 | 0.14 ± 0.04 | 0.10 ± 0.01 | 0.12 ± 0.00          |
| <b>Pancreas</b>    | 11.8 ± 2.4                          | 13.7 ± 2.5   | 12.5 ± 2.8  | 8.16 ± 0.36 | 5.38 ± 0.45 | 4.71 ± 0.99 | 0.30 ± 0.05          |
| <b>Kidney</b>      | 89.8 ± 9.0                          | 119 ± 19     | 125 ± 17    | 99.3 ± 9.2  | 58.6 ± 4.3  | 45.8 ± 3.9  | 143 ± 5              |
| <b>Liver</b>       | 1.07 ± 0.35                         | 0.56 ± 0.10  | 0.30 ± 0.07 | 0.20 ± 0.03 | 0.14 ± 0.01 | 0.14 ± 0.02 | 0.25 ± 0.03          |
| <b>Stomach</b>     | 3.06 ± 0.71                         | 2.72 ± 0.96  | 1.80 ± 0.33 | 1.39 ± 0.41 | 0.99 ± 0.06 | 0.91 ± 0.19 | 0.10 ± 0.01          |
| <b>Duodenum</b>    | 6.16 ± 2.17                         | 5.62 ± 1.97  | 4.26 ± 1.27 | 4.04 ± 0.97 | 3.13 ± 0.90 | 3.48 ± 1.04 | 0.31 ± 0.04          |
| <b>Colon</b>       | 1.35 ± 0.43                         | 0.84 ± 0.16  | 0.53 ± 0.15 | 0.30 ± 0.06 | 0.21 ± 0.04 | 0.17 ± 0.03 | 0.03 ± 0.00          |
| <b>Femur</b>       | 0.40 ± 0.12                         | 0.16 ± 0.03  | 0.05 ± 0.02 | 0.02 ± 0.01 | 0.03 ± 0.01 | 0.01 ± 0.01 | 0.03 ± 0.00          |
| <b>Bone marrow</b> | 0.57 ± 0.39                         | 0.25 ± 0.15  | 0.14 ± 0.05 | 0.11 ± 0.02 | 0.13 ± 0.04 | 0.12 ± 0.03 | 0.14 ± 0.01          |

75  
76

77 **Table S4B.** Biodistribution of [<sup>177</sup>Lu]Lu-DOTA-MI-exendin-4 in BALB/c nude mice bearing a subcutaneous INS-1 tumor. Values  
 78 are expressed as percentage injected activity per gram tissue (%IA/g).

|                    | <b>[<sup>177</sup>Lu]Lu-DOTA-MI-exendin-4</b> |              |             |             |             |             |                      |
|--------------------|-----------------------------------------------|--------------|-------------|-------------|-------------|-------------|----------------------|
|                    | 15min (n=5)                                   | 30 min (n=5) | 4h (n=5)    | 24h (n=5)   | 48h (n=5)   | 72h (n=5)   | + excess<br>4h (n=2) |
| <b>Blood</b>       | 2.01 ± 0.20                                   | 1.05 ± 0.12  | 0.17 ± 0.02 | 0.03 ± 0.00 | 0.01 ± 0.00 | 0.01 ± 0.00 | 0.13 ± 0.01          |
| <b>Muscle</b>      | 0.37 ± 0.05                                   | 0.14 ± 0.03  | 0.02 ± 0.00 | 0.01 ± 0.00 | 0.01 ± 0.00 | 0.00 ± 0.00 | 0.02 ± 0.00          |
| <b>Tumor</b>       | 15.9 ± 2.4                                    | 18.9 ± 4.2   | 13.4 ± 2.5  | 7.81 ± 1.54 | 4.24 ± 0.63 | 3.65 ± 1.74 | 0.61 ± 0.06          |
| <b>Heart</b>       | 0.78 ± 0.11                                   | 0.40 ± 0.01  | 0.12 ± 0.02 | 0.04 ± 0.01 | 0.03 ± 0.00 | 0.01 ± 0.00 | 0.08 ± 0.00          |
| <b>Lung</b>        | 7.59 ± 2.34                                   | 5.34 ± 0.94  | 1.99 ± 0.59 | 1.26 ± 0.43 | 0.78 ± 0.27 | 0.35 ± 0.17 | 0.34 ± 0.01          |
| <b>Spleen</b>      | 0.52 ± 0.10                                   | 0.37 ± 0.19  | 0.15 ± 0.04 | 0.07 ± 0.01 | 0.05 ± 0.00 | 0.04 ± 0.01 | 0.13 ± 0.01          |
| <b>Pancreas</b>    | 8.63 ± 1.34                                   | 8.29 ± 1.03  | 6.35 ± 1.20 | 1.79 ± 0.32 | 1.03 ± 0.10 | 0.58 ± 0.06 | 0.28 ± 0.03          |
| <b>Kidney</b>      | 90.5 ± 6.2                                    | 106 ± 7      | 103 ± 12    | 39.4 ± 6.3  | 22.6 ± 3.3  | 13.0 ± 2.5  | 100 ± 10             |
| <b>Liver</b>       | 0.99 ± 0.12                                   | 0.77 ± 0.41  | 0.24 ± 0.03 | 0.12 ± 0.02 | 0.09 ± 0.01 | 0.07 ± 0.01 | 0.35 ± 0.00          |
| <b>Stomach</b>     | 2.70 ± 0.86                                   | 1.87 ± 0.13  | 1.00 ± 0.05 | 0.55 ± 0.17 | 0.38 ± 0.04 | 0.20 ± 0.01 | 0.11 ± 0.00          |
| <b>Duodenum</b>    | 4.26 ± 1.11                                   | 4.41 ± 1.52  | 2.42 ± 1.13 | 1.24 ± 0.15 | 1.00 ± 0.44 | 0.75 ± 0.23 | 0.32 ± 0.06          |
| <b>Colon</b>       | 0.79 ± 0.26                                   | 0.60 ± 0.05  | 0.31 ± 0.05 | 0.16 ± 0.02 | 0.12 ± 0.02 | 0.06 ± 0.01 | 0.09 ± 0.00          |
| <b>Femur</b>       | 0.35 ± 0.09                                   | 0.16 ± 0.03  | 0.04 ± 0.01 | 0.04 ± 0.05 | 0.01 ± 0.00 | 0.01 ± 0.01 | 0.05 ± 0.00          |
| <b>Bone marrow</b> | 0.54 ± 0.11                                   | 0.34 ± 0.08  | 0.14 ± 0.03 | 0.09 ± 0.04 | 0.07 ± 0.03 | 0.04 ± 0.02 | 0.28 ± 0.09          |

79
